# Supplementary material
Source: publisher figshare collection journal article supplement (https://future-science-group.figshare.com/ndownloader/files/35054554)
Supplement: Supplementary file 1 [file 35054554]

**Search strategy of Pubmed**

Search number Search Details Results

5 #3 and #4 6

4 (("visual"[All Fields] OR "visualisation"[All Fields] OR "visualisations"[All Fields] OR "visualise"[All Fields] OR "visualised"[All Fields] OR "visualises"[All Fields] OR "visualising"[All Fields] OR "visualization"[All Fields] OR "visualizations"[All Fields] OR "visualize"[All Fields] OR "visualized"[All Fields] OR "visualizer"[All Fields] OR "visualizers"[All Fields] OR "visualizes"[All Fields] OR "visualizing"[All Fields] OR "visually"[All Fields] OR "visuals"[All Fields]) AND "preconditioning"[Title/Abstract]) OR (("visual"[All Fields] OR "visualisation"[All Fields] OR "visualisations"[All Fields] OR "visualise"[All Fields] OR "visualised"[All Fields] OR "visualises"[All Fields] OR "visualising"[All Fields] OR "visualization"[All Fields] OR "visualizations"[All Fields] OR "visualize"[All Fields] OR "visualized"[All Fields] OR "visualizer"[All Fields] OR "visualizers"[All Fields] OR "visualizes"[All Fields] OR "visualizing"[All Fields] OR "visually"[All Fields] OR "visuals"[All Fields]) AND "pretreatment"[Title/Abstract]) OR ((("eye"[MeSH Terms] OR "eye"[All Fields]) AND ("cover"[All Fields] OR "cover s"[All Fields] OR "covered"[All Fields] OR "covering"[All Fields] OR "coverings"[All Fields] OR "covers"[All Fields])) AND "pretreatment"[Title/Abstract]) OR ((("eye"[MeSH Terms] OR "eye"[All Fields]) AND ("cover"[All Fields] OR "cover s"[All Fields] OR "covered"[All Fields] OR "covering"[All Fields] OR "coverings"[All Fields] OR "covers"[All Fields])) AND "preconditioning"[Title/Abstract]) OR ("eye-covering"[All Fields] AND "pretreatment"[Title/Abstract]) OR ("eye-covering"[All Fields] AND "preconditioning"[Title/Abstract]) OR ((("eye"[MeSH Terms] OR "eye"[All Fields]) AND ("shade"[All Fields] OR "shaded"[All Fields] OR "shades"[All Fields] OR "shading"[All Fields] OR "shadings"[All Fields])) AND "pretreatment"[Title/Abstract]) OR ((("eye"[MeSH Terms] OR "eye"[All Fields]) AND ("shade"[All Fields] OR "shaded"[All Fields] OR "shades"[All Fields] OR "shading"[All Fields] OR "shadings"[All Fields])) AND "preconditioning"[Title/Abstract]) OR ("pretreatment"[Title/Abstract]) OR ("preconditioning"[Title/Abstract]) 235,716

3 #1 or #2 1,157

2 "emergence delirium"[Title/Abstract] OR "acute delirium"[Title/Abstract] OR "anesthesia emergence delirium"[Title/Abstract] OR "emergence excitement"[Title/Abstract] OR "postanesthetic excitement"[Title/Abstract] OR "agitated emergence"[Title/Abstract] OR "emergence agitation"[Title/Abstract] 995

1 "Emergence Delirium"[MeSH Terms] 306

**Search strategy of Embase**

.......................................................

No. Query Results Results Date

#5. #3 AND #4 2

#4. 'visual preconditioning':ti,ab,kw OR 'visual 2

pretreatment':ti,ab,kw OR 'eye covering

pretreatment':ti,ab,kw OR 'eye covering

preconditioning':ti,ab,kw OR 'eye-covering

pretreatment':ti,ab,kw OR 'eye-covering

preconditioning':ti,ab,kw OR 'eye shading

pretreatment':ti,ab,kw OR 'eye shading

preconditioning':ti,ab,kw OR 'eye-shading

pretreatment':ti,ab,kw OR 'eye-shading

preconditioning':ti,ab,kw

#3. #1 OR #2 1,496

#2. 'emergence agitation'/exp 584

#1. 'emergence delirium':ti,ab,kw OR 'acute 1,361

delirium':ti,ab,kw OR 'anesthesia emergence

delirium':ti,ab,kw OR 'emergence

excitement':ti,ab,kw OR 'postanesthetic

excitement':ti,ab,kw OR 'agitated

emergence':ti,ab,kw OR 'emergence

agitation':ti,ab,kw

.......................................................

**Search strategy of Cochrane library**

ID Search Hits

#1 (emergence delirium):ti,ab,kw OR (acute delirium):ti,ab,kw OR (Anesthesia Emergence Delirium):ti,ab,kw OR (Emergence Excitement):ti,ab,kw OR (Postanesthetic Excitement):ti,ab,kw 1320

#2 (Agitated Emergence):ti,ab,kw OR (Emergence Agitation):ti,ab,kw 866

#3 #1 or #2 1869

#4 MeSH descriptor: [Emergence Delirium] explode all trees 120

#5 #3 or #4 1869

#6 (Visual preconditioning):ti,ab,kw OR (visual pretreatment):ti,ab,kw OR (eye covering pretreatment):ti,ab,kw OR (eye covering preconditioning):ti,ab,kw OR (eye-covering pretreatment):ti,ab,kw 1418

#7 (eye-covering preconditioning):ti,ab,kw OR (eye shading pretreatment):ti,ab,kw OR (eye shading preconditioning):ti,ab,kw OR (eye-shading pretreatment):ti,ab,kw OR (eye-shading preconditioning):ti,ab,kw 0

#8 #6 or #7 1418

#9 #5 and #8 3

**Search strategy of CNKI**

检索范围：总库 （主题：苏醒期谵妄（精确））OR（主题：急性谵妄（精确））OR（主题：躁动（精确）） AND （（主题：视觉预处理（精确））OR（主题：遮光预处理（精确））OR（主题：遮眼预处理（精确））OR（主题：眼罩预处理（精确）））
